# Supplementary material
Source: publisher figshare collection journal article supplement (https://gsajournals.figshare.com/ndownloader/files/12810752)
Supplement: Supplementary file 1 [file 12810752]

## Sheet: TableS3a
List of SNPs with inconsistent genotype calls in control sample (cv. Adirondack) repeated 16 times
solcap_snp_ID
solcap_snp_c1_16459
solcap_snp_c2_14613
solcap_snp_c2_5934
solcap_snp_c2_54803
solcap_snp_c2_57217
solcap_snp_c2_17757
solcap_snp_c1_11123
solcap_snp_c1_4951
solcap_snp_c2_18683
solcap_snp_c2_39962
solcap_snp_c2_4887
solcap_snp_c2_40169
solcap_snp_c1_16421
solcap_snp_c2_18664
solcap_snp_c2_35970
solcap_snp_c2_46102
solcap_snp_c2_11270
solcap_snp_c2_22073
solcap_snp_c2_24653
solcap_snp_c2_39220
solcap_snp_c1_8330
solcap_snp_c2_53068
solcap_snp_c2_47609
solcap_snp_c2_47313
solcap_snp_c2_54366
solcap_snp_c2_51756
solcap_snp_c1_3499
solcap_snp_c2_50620
solcap_snp_c2_7631
solcap_snp_c2_31338
solcap_snp_c2_55639
solcap_snp_c2_18225
solcap_snp_c2_1155
solcap_snp_c2_25929
solcap_snp_c1_6148
solcap_snp_c2_50903
solcap_snp_c2_20097
solcap_snp_c2_29344
solcap_snp_c2_55241
solcap_snp_c2_57676
solcap_snp_c2_22752
solcap_snp_c2_51113
solcap_snp_c2_28474
solcap_snp_c1_13786
solcap_snp_c1_3693
solcap_snp_c2_45751
solcap_snp_c2_21332
solcap_snp_c1_7268
solcap_snp_c2_55284
solcap_snp_c1_8659
solcap_snp_c2_10683
solcap_snp_c2_22890
solcap_snp_c2_12921
solcap_snp_c1_4029
solcap_snp_c1_111
solcap_snp_c1_7005
solcap_snp_c1_15780
solcap_snp_c2_27677
solcap_snp_c1_16111
solcap_snp_c1_1737
solcap_snp_c2_12531
solcap_snp_c2_51329
solcap_snp_c2_21236
solcap_snp_c2_55793
solcap_snp_c2_15533
solcap_snp_c2_35503
solcap_snp_c2_4711
solcap_snp_c2_12334
solcap_snp_c2_3684
solcap_snp_c1_4140
solcap_snp_c2_13613
solcap_snp_c2_43588
solcap_snp_c2_19701
solcap_snp_c1_14542
solcap_snp_c2_50283
solcap_snp_c2_57805
solcap_snp_c1_13923
solcap_snp_c2_1483
solcap_snp_c2_398
solcap_snp_c2_7423
solcap_snp_c1_7722
solcap_snp_c2_26799
solcap_snp_c2_3153
solcap_snp_c1_13085
solcap_snp_c1_601
solcap_snp_c2_42964
solcap_snp_c2_12937
solcap_snp_c2_25485
solcap_snp_c2_4383
solcap_snp_c2_47200
solcap_snp_c2_5474
solcap_snp_c2_5774
solcap_snp_c2_28849
solcap_snp_c2_25471
solcap_snp_c2_39804
solcap_snp_c2_46777
solcap_snp_c2_35572
solcap_snp_c1_4178
solcap_snp_c2_42168
solcap_snp_c2_534

## Sheet: TableS3b
List of SNPs with multiple mapping positions (Hirsch et al., 2013) in the potato genome
solcap_snp_ID
solcap_snp_c1_10477
solcap_snp_c1_10478
solcap_snp_c1_10479
solcap_snp_c1_10480
solcap_snp_c1_10777
solcap_snp_c1_10920
solcap_snp_c1_10921
solcap_snp_c1_11117
solcap_snp_c1_11126
solcap_snp_c1_11150
solcap_snp_c1_1116
solcap_snp_c1_11612
solcap_snp_c1_11613
solcap_snp_c1_11667
solcap_snp_c1_11725
solcap_snp_c1_11773
solcap_snp_c1_11921
solcap_snp_c1_11922
solcap_snp_c1_12030
solcap_snp_c1_12032
solcap_snp_c1_12057
solcap_snp_c1_12063
solcap_snp_c1_12064
solcap_snp_c1_12139
solcap_snp_c1_12189
solcap_snp_c1_12190
solcap_snp_c1_13166
solcap_snp_c1_13506
solcap_snp_c1_13651
solcap_snp_c1_13658
solcap_snp_c1_13764
solcap_snp_c1_13765
solcap_snp_c1_14503
solcap_snp_c1_1458
solcap_snp_c1_14797
solcap_snp_c1_15041
solcap_snp_c1_15098
solcap_snp_c1_15259
solcap_snp_c1_15312
solcap_snp_c1_15357
solcap_snp_c1_15488
solcap_snp_c1_15489
solcap_snp_c1_15763
solcap_snp_c1_15816
solcap_snp_c1_15818
solcap_snp_c1_15842
solcap_snp_c1_15843
solcap_snp_c1_15886
solcap_snp_c1_16291
solcap_snp_c1_16376
solcap_snp_c1_16394
solcap_snp_c1_16439
solcap_snp_c1_16490
solcap_snp_c1_16496
solcap_snp_c1_16642
solcap_snp_c1_16653
solcap_snp_c1_16689
solcap_snp_c1_16690
solcap_snp_c1_2067
solcap_snp_c1_2838
solcap_snp_c1_2839
solcap_snp_c1_3062
solcap_snp_c1_3063
solcap_snp_c1_3064
solcap_snp_c1_3065
solcap_snp_c1_3917
solcap_snp_c1_4005
solcap_snp_c1_4415
solcap_snp_c1_4489
solcap_snp_c1_4579
solcap_snp_c1_4688
solcap_snp_c1_4695
solcap_snp_c1_4782
solcap_snp_c1_4783
solcap_snp_c1_4784
solcap_snp_c1_4823
solcap_snp_c1_5302
solcap_snp_c1_5303
solcap_snp_c1_5598
solcap_snp_c1_5600
solcap_snp_c1_5601
solcap_snp_c1_5602
solcap_snp_c1_5783
solcap_snp_c1_6358
solcap_snp_c1_6635
solcap_snp_c1_6711
solcap_snp_c1_7442
solcap_snp_c1_7489
solcap_snp_c1_7829
solcap_snp_c1_8128
solcap_snp_c1_8337
solcap_snp_c1_8404
solcap_snp_c1_8405
solcap_snp_c1_8437
solcap_snp_c1_8572
solcap_snp_c1_8573
solcap_snp_c1_9219
solcap_snp_c1_9416
solcap_snp_c1_9566
solcap_snp_c1_9585
solcap_snp_c1_9660
solcap_snp_c1_973
solcap_snp_c1_9816
solcap_snp_c1_9834
solcap_snp_c1_9871
solcap_snp_c2_10275
solcap_snp_c2_11020
solcap_snp_c2_11021
solcap_snp_c2_11736
solcap_snp_c2_11737
solcap_snp_c2_11739
solcap_snp_c2_11740
solcap_snp_c2_11741
solcap_snp_c2_11742
solcap_snp_c2_11744
solcap_snp_c2_11746
solcap_snp_c2_13060
solcap_snp_c2_13158
solcap_snp_c2_13675
solcap_snp_c2_13676
solcap_snp_c2_13681
solcap_snp_c2_14469
solcap_snp_c2_14595
solcap_snp_c2_14632
solcap_snp_c2_14633
solcap_snp_c2_14642
solcap_snp_c2_14643
solcap_snp_c2_14951
solcap_snp_c2_14952
solcap_snp_c2_14953
solcap_snp_c2_14983
solcap_snp_c2_14986
solcap_snp_c2_14987
solcap_snp_c2_15335
solcap_snp_c2_15803
solcap_snp_c2_15804
solcap_snp_c2_16711
solcap_snp_c2_16725
solcap_snp_c2_16726
solcap_snp_c2_16729
solcap_snp_c2_16730
solcap_snp_c2_17092
solcap_snp_c2_17381
solcap_snp_c2_17382
solcap_snp_c2_17610
solcap_snp_c2_17618
solcap_snp_c2_17815
solcap_snp_c2_18238
solcap_snp_c2_1830
solcap_snp_c2_18810
solcap_snp_c2_1887
solcap_snp_c2_19453
solcap_snp_c2_19718
solcap_snp_c2_20530
solcap_snp_c2_21305
solcap_snp_c2_2170
solcap_snp_c2_21822
solcap_snp_c2_21913
solcap_snp_c2_22299
solcap_snp_c2_22749
solcap_snp_c2_22750
solcap_snp_c2_22752
solcap_snp_c2_22753
solcap_snp_c2_22764
solcap_snp_c2_22765
solcap_snp_c2_22988
solcap_snp_c2_22989
solcap_snp_c2_22990
solcap_snp_c2_22991
solcap_snp_c2_22992
solcap_snp_c2_22995
solcap_snp_c2_23067
solcap_snp_c2_23289
solcap_snp_c2_23290
solcap_snp_c2_23291
solcap_snp_c2_23295
solcap_snp_c2_23409
solcap_snp_c2_23416
solcap_snp_c2_23455
solcap_snp_c2_23713
solcap_snp_c2_23938
solcap_snp_c2_24169
solcap_snp_c2_25220
solcap_snp_c2_25363
solcap_snp_c2_25364
solcap_snp_c2_25891
solcap_snp_c2_25892
solcap_snp_c2_26200
solcap_snp_c2_26647
solcap_snp_c2_26828
solcap_snp_c2_26829
solcap_snp_c2_26830
solcap_snp_c2_26831
solcap_snp_c2_27198
solcap_snp_c2_27437
solcap_snp_c2_27438
solcap_snp_c2_27439
solcap_snp_c2_27751
solcap_snp_c2_27755
solcap_snp_c2_27756
solcap_snp_c2_28599
solcap_snp_c2_28600
solcap_snp_c2_2868
solcap_snp_c2_28984
solcap_snp_c2_29820
solcap_snp_c2_29823
solcap_snp_c2_29825
solcap_snp_c2_29829
solcap_snp_c2_29830
solcap_snp_c2_29833
solcap_snp_c2_29855
solcap_snp_c2_30358
solcap_snp_c2_30359
solcap_snp_c2_30432
solcap_snp_c2_30446
solcap_snp_c2_30513
solcap_snp_c2_30514
solcap_snp_c2_30515
solcap_snp_c2_30516
solcap_snp_c2_30557
solcap_snp_c2_30617
solcap_snp_c2_30627
solcap_snp_c2_30628
solcap_snp_c2_30629
solcap_snp_c2_31385
solcap_snp_c2_31389
solcap_snp_c2_31390
solcap_snp_c2_31391
solcap_snp_c2_31971
solcap_snp_c2_31972
solcap_snp_c2_31975
solcap_snp_c2_31976
solcap_snp_c2_3220
solcap_snp_c2_3224
solcap_snp_c2_32333
solcap_snp_c2_32334
solcap_snp_c2_32335
solcap_snp_c2_32336
solcap_snp_c2_32337
solcap_snp_c2_32338
solcap_snp_c2_32478
solcap_snp_c2_3260
solcap_snp_c2_32785
solcap_snp_c2_32788
solcap_snp_c2_33276
solcap_snp_c2_33277
solcap_snp_c2_33424
solcap_snp_c2_33688
solcap_snp_c2_34175
solcap_snp_c2_34176
solcap_snp_c2_34222
solcap_snp_c2_34266
solcap_snp_c2_34430
solcap_snp_c2_34457
solcap_snp_c2_34458
solcap_snp_c2_34500
solcap_snp_c2_34936
solcap_snp_c2_35108
solcap_snp_c2_35110
solcap_snp_c2_35348
solcap_snp_c2_35349
solcap_snp_c2_35352
solcap_snp_c2_35353
solcap_snp_c2_35556
solcap_snp_c2_35621
solcap_snp_c2_35653
solcap_snp_c2_36358
solcap_snp_c2_36359
solcap_snp_c2_36361
solcap_snp_c2_36362
solcap_snp_c2_36363
solcap_snp_c2_36364
solcap_snp_c2_36365
solcap_snp_c2_36642
solcap_snp_c2_36643
solcap_snp_c2_36644
solcap_snp_c2_36648
solcap_snp_c2_36649
solcap_snp_c2_36650
solcap_snp_c2_36651
solcap_snp_c2_36652
solcap_snp_c2_36653
solcap_snp_c2_36654
solcap_snp_c2_36655
solcap_snp_c2_36656
solcap_snp_c2_36686
solcap_snp_c2_36704
solcap_snp_c2_36869
solcap_snp_c2_36943
solcap_snp_c2_36944
solcap_snp_c2_36945
solcap_snp_c2_37070
solcap_snp_c2_37206
solcap_snp_c2_37207
solcap_snp_c2_37212
solcap_snp_c2_37213
solcap_snp_c2_37242
solcap_snp_c2_37256
solcap_snp_c2_37343
solcap_snp_c2_37502
solcap_snp_c2_37564
solcap_snp_c2_37565
solcap_snp_c2_37566
solcap_snp_c2_37588
solcap_snp_c2_37958
solcap_snp_c2_37959
solcap_snp_c2_37964
solcap_snp_c2_37965
solcap_snp_c2_37966
solcap_snp_c2_37967
solcap_snp_c2_38127
solcap_snp_c2_3828
solcap_snp_c2_38741
solcap_snp_c2_39102
solcap_snp_c2_39103
solcap_snp_c2_39219
solcap_snp_c2_39220
solcap_snp_c2_39221
solcap_snp_c2_39222
solcap_snp_c2_39223
solcap_snp_c2_39224
solcap_snp_c2_39226
solcap_snp_c2_39406
solcap_snp_c2_39420
solcap_snp_c2_40075
solcap_snp_c2_40076
solcap_snp_c2_40078
solcap_snp_c2_40079
solcap_snp_c2_40094
solcap_snp_c2_40470
solcap_snp_c2_40640
solcap_snp_c2_40829
solcap_snp_c2_40836
solcap_snp_c2_40837
solcap_snp_c2_40838
solcap_snp_c2_40966
solcap_snp_c2_41176
solcap_snp_c2_41381
solcap_snp_c2_41382
solcap_snp_c2_41383
solcap_snp_c2_41384
solcap_snp_c2_41385
solcap_snp_c2_41386
solcap_snp_c2_42265
solcap_snp_c2_42266
solcap_snp_c2_42525
solcap_snp_c2_42734
solcap_snp_c2_42768
solcap_snp_c2_42769
solcap_snp_c2_42770
solcap_snp_c2_43128
solcap_snp_c2_43187
solcap_snp_c2_43499
solcap_snp_c2_43500
solcap_snp_c2_43502
solcap_snp_c2_43505
solcap_snp_c2_43508
solcap_snp_c2_43509
solcap_snp_c2_43510
solcap_snp_c2_43514
solcap_snp_c2_43711
solcap_snp_c2_43734
solcap_snp_c2_43773
solcap_snp_c2_43817
solcap_snp_c2_43849
solcap_snp_c2_43850
solcap_snp_c2_43852
solcap_snp_c2_43975
solcap_snp_c2_4411
solcap_snp_c2_4412
solcap_snp_c2_4413
solcap_snp_c2_4414
solcap_snp_c2_44225
solcap_snp_c2_44421
solcap_snp_c2_44422
solcap_snp_c2_44954
solcap_snp_c2_44956
solcap_snp_c2_44957
solcap_snp_c2_44958
solcap_snp_c2_44959
solcap_snp_c2_45037
solcap_snp_c2_45038
solcap_snp_c2_45039
solcap_snp_c2_45042
solcap_snp_c2_45067
solcap_snp_c2_45200
solcap_snp_c2_45235
solcap_snp_c2_45392
solcap_snp_c2_45505
solcap_snp_c2_45856
solcap_snp_c2_46149
solcap_snp_c2_46151
solcap_snp_c2_46152
solcap_snp_c2_46224
solcap_snp_c2_46225
solcap_snp_c2_46226
solcap_snp_c2_46310
solcap_snp_c2_46311
solcap_snp_c2_46314
solcap_snp_c2_46322
solcap_snp_c2_46478
solcap_snp_c2_46479
solcap_snp_c2_46480
solcap_snp_c2_46481
solcap_snp_c2_46482
solcap_snp_c2_46483
solcap_snp_c2_46507
solcap_snp_c2_46508
solcap_snp_c2_46509
solcap_snp_c2_46510
solcap_snp_c2_46511
solcap_snp_c2_46513
solcap_snp_c2_46514
solcap_snp_c2_46515
solcap_snp_c2_46516
solcap_snp_c2_46517
solcap_snp_c2_46518
solcap_snp_c2_46519
solcap_snp_c2_46808
solcap_snp_c2_4688
solcap_snp_c2_4689
solcap_snp_c2_4691
solcap_snp_c2_46917
solcap_snp_c2_4692
solcap_snp_c2_4693
solcap_snp_c2_46975
solcap_snp_c2_47304
solcap_snp_c2_4744
solcap_snp_c2_47926
solcap_snp_c2_47927
solcap_snp_c2_47946
solcap_snp_c2_47955
solcap_snp_c2_47956
solcap_snp_c2_47964
solcap_snp_c2_47965
solcap_snp_c2_48860
solcap_snp_c2_49047
solcap_snp_c2_49061
solcap_snp_c2_49062
solcap_snp_c2_49063
solcap_snp_c2_49064
solcap_snp_c2_49066
solcap_snp_c2_49067
solcap_snp_c2_49326
solcap_snp_c2_49460
solcap_snp_c2_49587
solcap_snp_c2_49739
solcap_snp_c2_49745
solcap_snp_c2_49756
solcap_snp_c2_50133
solcap_snp_c2_50134
solcap_snp_c2_50281
solcap_snp_c2_50283
solcap_snp_c2_50284
solcap_snp_c2_50285
solcap_snp_c2_50286
solcap_snp_c2_50287
solcap_snp_c2_50288
solcap_snp_c2_50289
solcap_snp_c2_50290
solcap_snp_c2_50291
solcap_snp_c2_50292
solcap_snp_c2_50295
solcap_snp_c2_50296
solcap_snp_c2_50297
solcap_snp_c2_50312
solcap_snp_c2_50313
solcap_snp_c2_50314
solcap_snp_c2_50315
solcap_snp_c2_50316
solcap_snp_c2_50317
solcap_snp_c2_50318
solcap_snp_c2_50319
solcap_snp_c2_50320
solcap_snp_c2_50321
solcap_snp_c2_50322
solcap_snp_c2_50323
solcap_snp_c2_50324
solcap_snp_c2_50325
solcap_snp_c2_50326
solcap_snp_c2_50327
solcap_snp_c2_50463
solcap_snp_c2_50710
solcap_snp_c2_50715
solcap_snp_c2_50725
solcap_snp_c2_50726
solcap_snp_c2_50859
solcap_snp_c2_50874
solcap_snp_c2_51203
solcap_snp_c2_51304
solcap_snp_c2_51600
solcap_snp_c2_51797
solcap_snp_c2_51847
solcap_snp_c2_51848
solcap_snp_c2_51953
solcap_snp_c2_51971
solcap_snp_c2_51972
solcap_snp_c2_51973
solcap_snp_c2_51974
solcap_snp_c2_51975
solcap_snp_c2_52037
solcap_snp_c2_52038
solcap_snp_c2_52039
solcap_snp_c2_52040
solcap_snp_c2_5216
solcap_snp_c2_5217
solcap_snp_c2_5218
solcap_snp_c2_52188
solcap_snp_c2_5219
solcap_snp_c2_5220
solcap_snp_c2_52208
solcap_snp_c2_52211
solcap_snp_c2_52267
solcap_snp_c2_52270
solcap_snp_c2_52370
solcap_snp_c2_52371
solcap_snp_c2_52715
solcap_snp_c2_52716
solcap_snp_c2_52894
solcap_snp_c2_52895
solcap_snp_c2_53337
solcap_snp_c2_53536
solcap_snp_c2_53544
solcap_snp_c2_53545
solcap_snp_c2_53563
solcap_snp_c2_53631
solcap_snp_c2_53659
solcap_snp_c2_53698
solcap_snp_c2_53745
solcap_snp_c2_53747
solcap_snp_c2_53776
solcap_snp_c2_53777
solcap_snp_c2_53778
solcap_snp_c2_53781
solcap_snp_c2_53783
solcap_snp_c2_5385
solcap_snp_c2_5387
solcap_snp_c2_5389
solcap_snp_c2_5391
solcap_snp_c2_5393
solcap_snp_c2_5394
solcap_snp_c2_53956
solcap_snp_c2_53957
solcap_snp_c2_53966
solcap_snp_c2_5399
solcap_snp_c2_54014
solcap_snp_c2_54044
solcap_snp_c2_54045
solcap_snp_c2_54046
solcap_snp_c2_54047
solcap_snp_c2_54048
solcap_snp_c2_54049
solcap_snp_c2_54050
solcap_snp_c2_54051
solcap_snp_c2_54053
solcap_snp_c2_5409
solcap_snp_c2_54202
solcap_snp_c2_54227
solcap_snp_c2_54240
solcap_snp_c2_54342
solcap_snp_c2_54379
solcap_snp_c2_54380
solcap_snp_c2_54383
solcap_snp_c2_54384
solcap_snp_c2_54386
solcap_snp_c2_54387
solcap_snp_c2_54388
solcap_snp_c2_54396
solcap_snp_c2_54442
solcap_snp_c2_54443
solcap_snp_c2_54453
solcap_snp_c2_54458
solcap_snp_c2_54484
solcap_snp_c2_54582
solcap_snp_c2_54583
solcap_snp_c2_54584
solcap_snp_c2_54585
solcap_snp_c2_54586
solcap_snp_c2_54587
solcap_snp_c2_54589
solcap_snp_c2_54604
solcap_snp_c2_54606
solcap_snp_c2_54607
solcap_snp_c2_54626
solcap_snp_c2_54627
solcap_snp_c2_54710
solcap_snp_c2_54790
solcap_snp_c2_54916
solcap_snp_c2_54917
solcap_snp_c2_54918
solcap_snp_c2_54919
solcap_snp_c2_54920
solcap_snp_c2_54921
solcap_snp_c2_54922
solcap_snp_c2_55244
solcap_snp_c2_55426
solcap_snp_c2_55629
solcap_snp_c2_55630
solcap_snp_c2_55639
solcap_snp_c2_55702
solcap_snp_c2_55703
solcap_snp_c2_55704
solcap_snp_c2_55717
solcap_snp_c2_55718
solcap_snp_c2_55720
solcap_snp_c2_55753
solcap_snp_c2_55762
solcap_snp_c2_55826
solcap_snp_c2_55850
solcap_snp_c2_55852
solcap_snp_c2_55854
solcap_snp_c2_55866
solcap_snp_c2_55887
solcap_snp_c2_55888
solcap_snp_c2_55889
solcap_snp_c2_55890
solcap_snp_c2_55896
solcap_snp_c2_55897
solcap_snp_c2_56341
solcap_snp_c2_56345
solcap_snp_c2_56346
solcap_snp_c2_56385
solcap_snp_c2_56565
solcap_snp_c2_56795
solcap_snp_c2_56796
solcap_snp_c2_56923
solcap_snp_c2_56934
solcap_snp_c2_56988
solcap_snp_c2_56989
solcap_snp_c2_56997
solcap_snp_c2_57005
solcap_snp_c2_57006
solcap_snp_c2_57007
solcap_snp_c2_57008
solcap_snp_c2_57049
solcap_snp_c2_57139
solcap_snp_c2_57170
solcap_snp_c2_57171
solcap_snp_c2_57213
solcap_snp_c2_57214
solcap_snp_c2_57215
solcap_snp_c2_57216
solcap_snp_c2_57217
solcap_snp_c2_57218
solcap_snp_c2_57238
solcap_snp_c2_57239
solcap_snp_c2_57240
solcap_snp_c2_57306
solcap_snp_c2_57366
solcap_snp_c2_57457
solcap_snp_c2_57619
solcap_snp_c2_57620
solcap_snp_c2_57621
solcap_snp_c2_57624
solcap_snp_c2_57627
solcap_snp_c2_57641
solcap_snp_c2_57642
solcap_snp_c2_57673
solcap_snp_c2_57674
solcap_snp_c2_57705
solcap_snp_c2_57720
solcap_snp_c2_57805
solcap_snp_c2_57809
solcap_snp_c2_57810
solcap_snp_c2_57811
solcap_snp_c2_57812
solcap_snp_c2_57813
solcap_snp_c2_57836
solcap_snp_c2_57862
solcap_snp_c2_57946
solcap_snp_c2_57994
solcap_snp_c2_57995
solcap_snp_c2_57998
solcap_snp_c2_58099
solcap_snp_c2_58146
solcap_snp_c2_58185
solcap_snp_c2_58191
solcap_snp_c2_58192
solcap_snp_c2_58193
solcap_snp_c2_58194
solcap_snp_c2_58195
solcap_snp_c2_58196
solcap_snp_c2_58197
solcap_snp_c2_58198
solcap_snp_c2_58199
solcap_snp_c2_58200
solcap_snp_c2_58201
solcap_snp_c2_58202
solcap_snp_c2_58204
solcap_snp_c2_58205
solcap_snp_c2_58207
solcap_snp_c2_58214
solcap_snp_c2_58222
solcap_snp_c2_58227
solcap_snp_c2_58229
solcap_snp_c2_58230
solcap_snp_c2_58326
solcap_snp_c2_58327
solcap_snp_c2_58328
solcap_snp_c2_58329
solcap_snp_c2_58330
solcap_snp_c2_58331
solcap_snp_c2_58332
solcap_snp_c2_58334
solcap_snp_c2_58335
solcap_snp_c2_58336
solcap_snp_c2_58337
solcap_snp_c2_58381
solcap_snp_c2_58382
solcap_snp_c2_58383
solcap_snp_c2_58385
solcap_snp_c2_6106
solcap_snp_c2_6198
solcap_snp_c2_6466
solcap_snp_c2_6467
solcap_snp_c2_6468
solcap_snp_c2_6469
solcap_snp_c2_6471
solcap_snp_c2_6472
solcap_snp_c2_6581
solcap_snp_c2_6641
solcap_snp_c2_677
solcap_snp_c2_6898
solcap_snp_c2_7080
solcap_snp_c2_7539
solcap_snp_c2_7541
solcap_snp_c2_7547
solcap_snp_c2_873
solcap_snp_c2_8789
solcap_snp_c2_9036
solcap_snp_c2_9037
solcap_snp_c2_95
solcap_snp_c2_9926
